# Supplementary material
Source: PubMed Central journal article supplement (PMC1805112)

Vav2  $+/+$

Vav2  $-/-$

Frontal

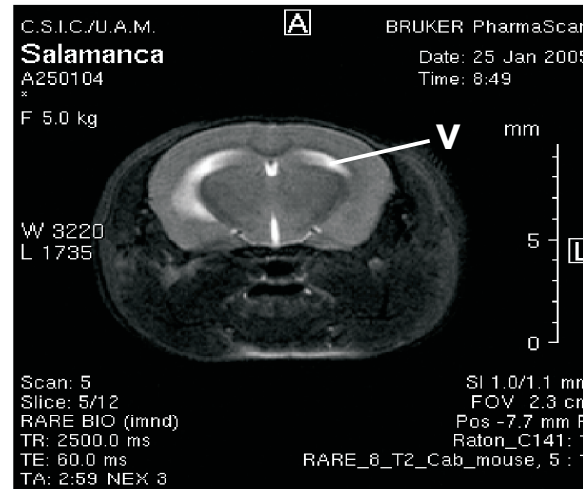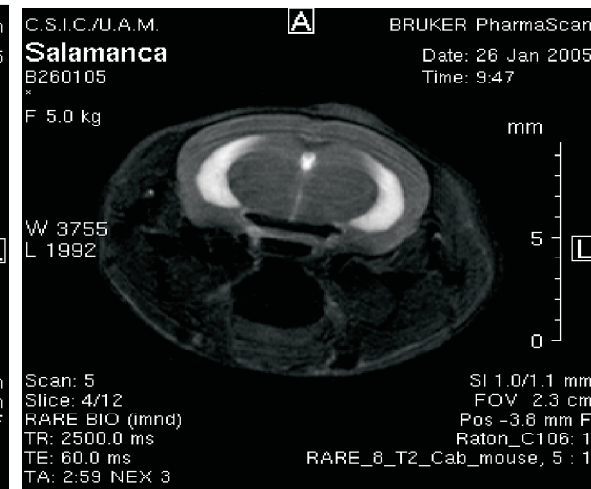

Horizontal

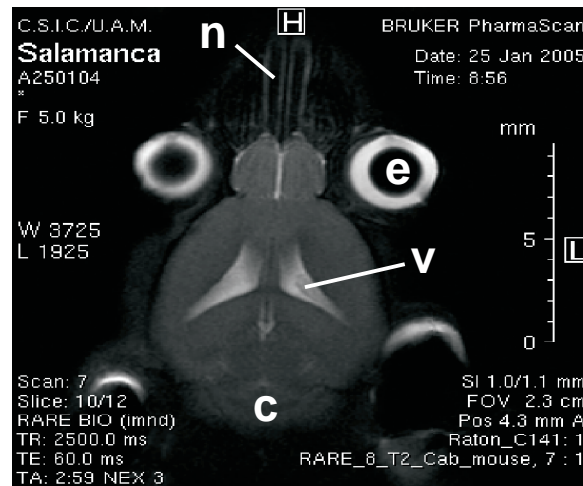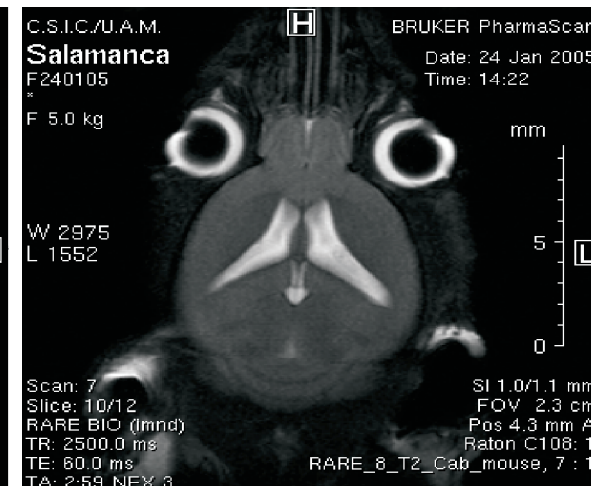

Supplement: mbc_E06-09-0877_1.pdf [file mbc_E06-09-0877_1.pdf]

**A**

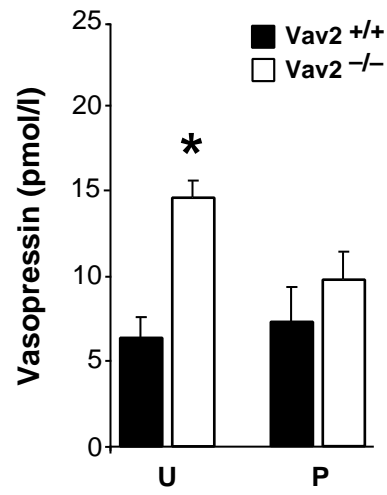

**B**

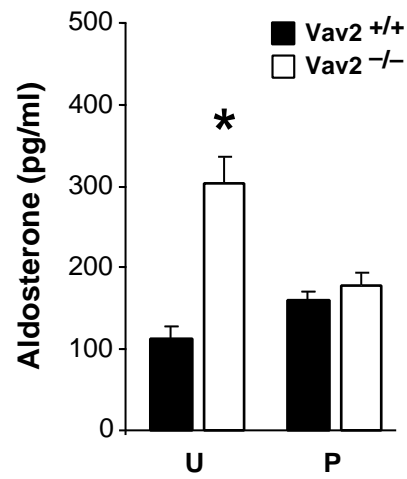

Supplement: mbc_E06-09-0877_2.pdf [file mbc_E06-09-0877_2.pdf]
